# Supplementary material for: Building an In-rich interphase to stabilize lithium metal anodes with a solid-like electrolyte
Source: Royal Society of Chemistry journal article supplement (doi:10.1039/d4qi02970d), 2024-12-23
Supplement: d4qi02970d1.pdf [file d4qi02970d1.pdf]

## Supporting information

### **Building an In-rich interphase to stabilize lithium metal anodes with a solid-like electrolyte**

Jiashuai Li, Dongze Li, Qiufen Li, Mengxi Bai, Xiang Wang, Xiaoyan Lin, Siyuan Shao, and Ziqi Wang\*

Department of Materials Science and Engineering, College of Chemistry and Materials Science, Jinan University, Guangzhou 511443, P. R. China

#### AUTHOR INFORMATION

#### **Corresponding Author**

Z.W.\* wangzq@jnu.edu.cn

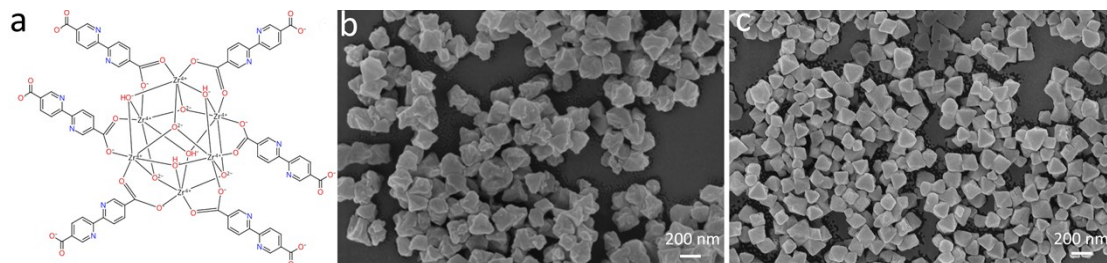

**Fig. S1.** (a) Structural formula of MOF-867. SEM images of the as-prepared (a) MOF-867 and (b) In-MOF.

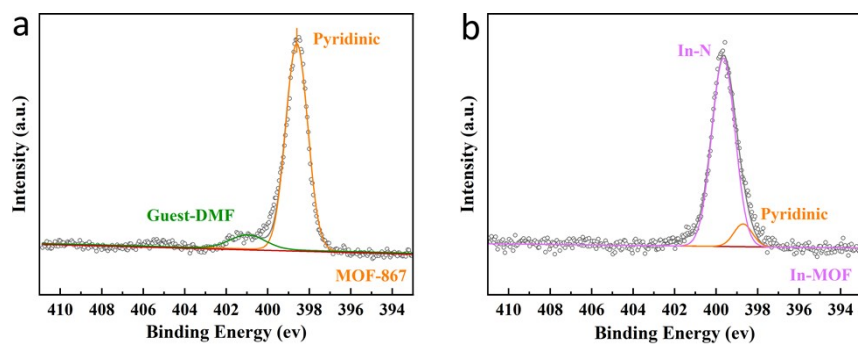

**Fig. S2.** The N 1s XPS spectra of (a) MOF-867 and (b) In-MOF.

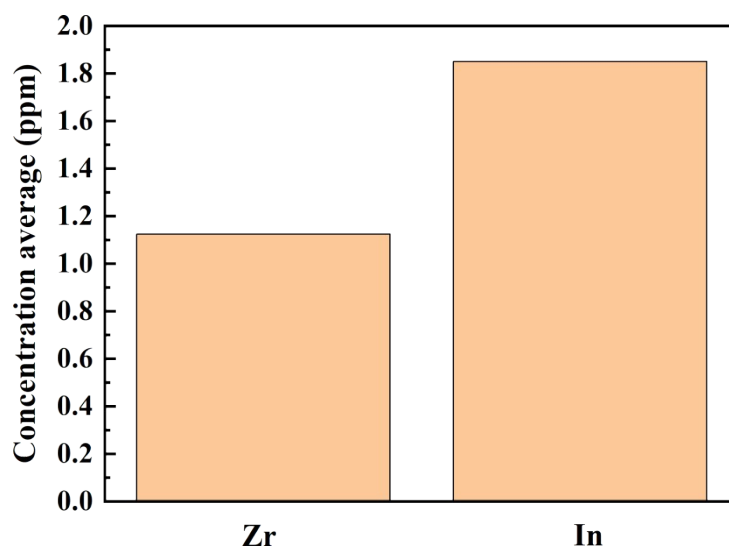

**Fig. S3.** Average Zr and In concentrations in ICP assays.

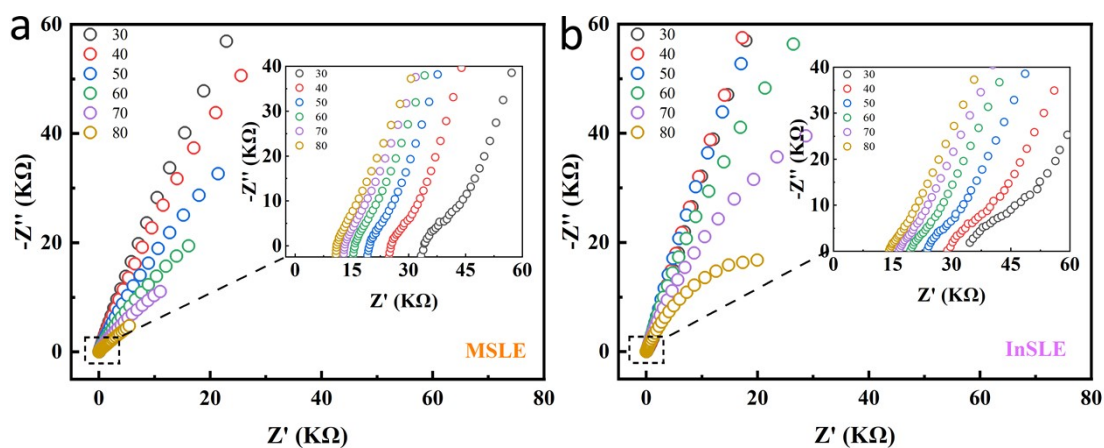

Fig. S4. The EIS spectra of the two MOF-based SLEs at different temperatures.

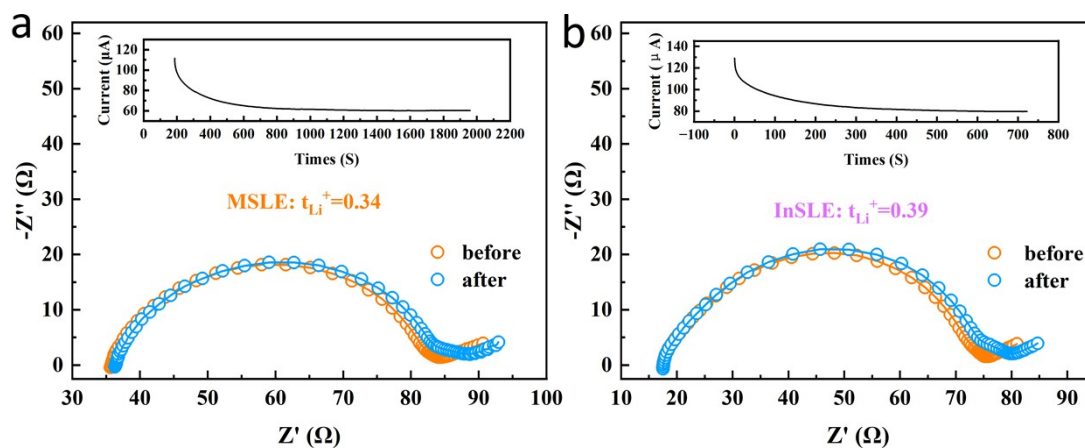

Fig. S5. The test for the  $t_{Li}^+$  of (a) MSLE and (b) InSLE.

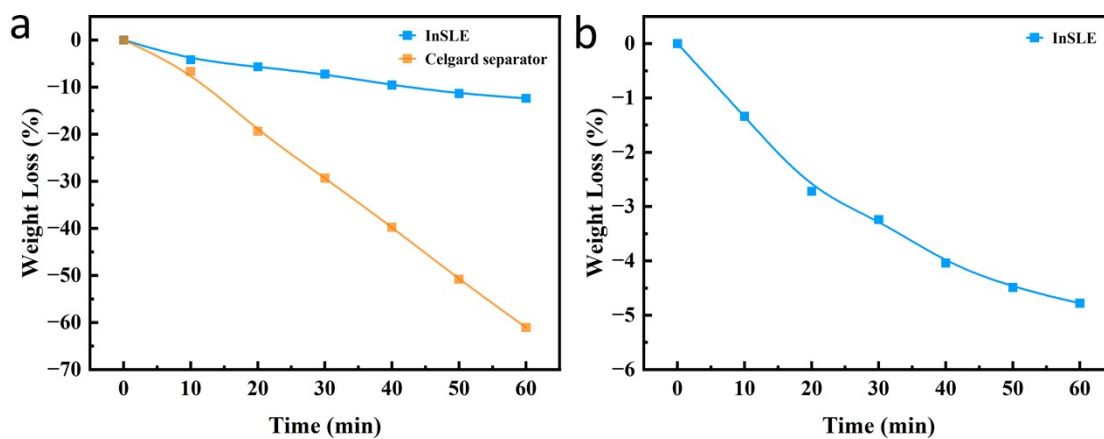

Fig. S6. Weight loss of the InSLE and the Celgard separator absorbed with  $30 \mu\text{l}$  PC electrolyte at (a)  $40^\circ\text{C}$  and (b) room temperature.

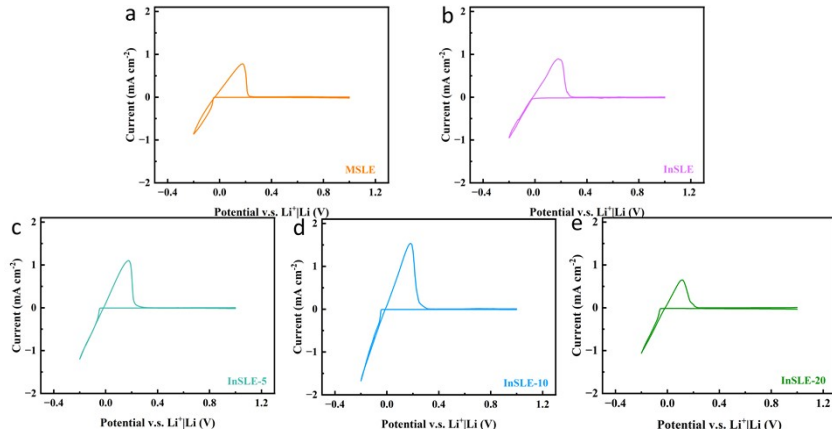

**Fig. S7.** CV profiles of the (a) MSLE, (b) InSLE (c) InSLE-5, (d) InSLE-10 and (e) InSLE-20 symmetric cells at a scan speed of 0.2 mV s<sup>-1</sup>.

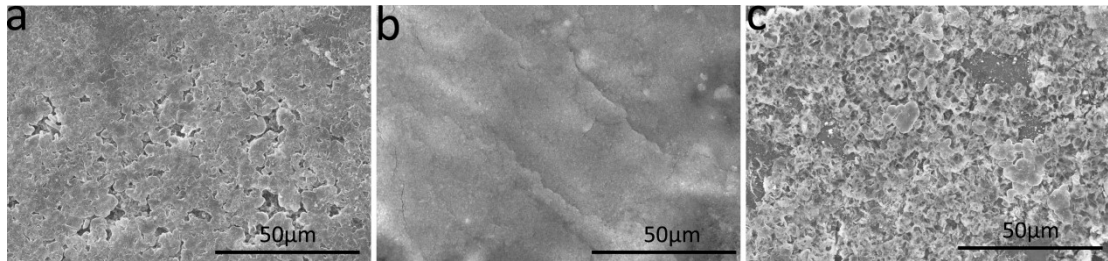

**Fig. S8.** SEM morphologies of the Li metal anodes after 20 cycles of plating/stripping tests with the (a) MSLE, (b) InSLE-10 and (c) InSLE electrolytes.

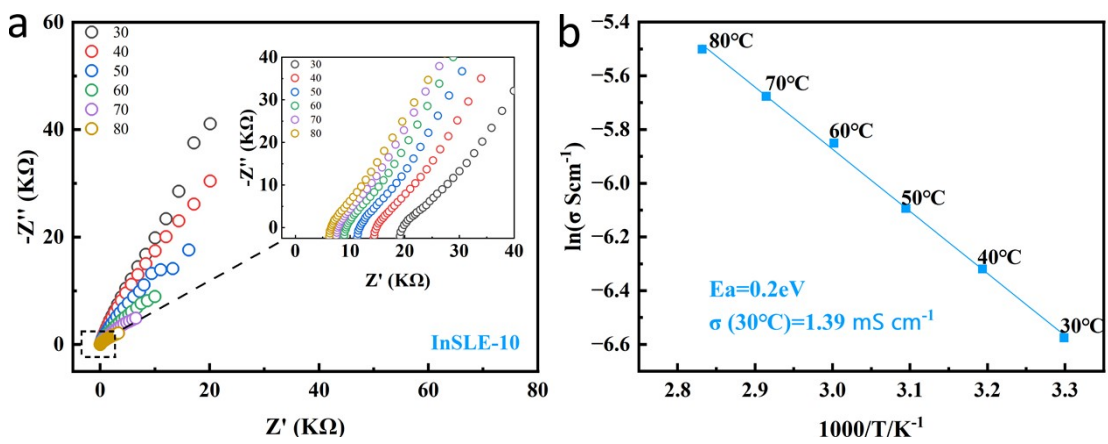

**Fig. S9.** (a) The EIS spectra of the InSLE-10 at different temperatures. (b) Arrhenius plot for the ionic conductivity of InSLE-10.

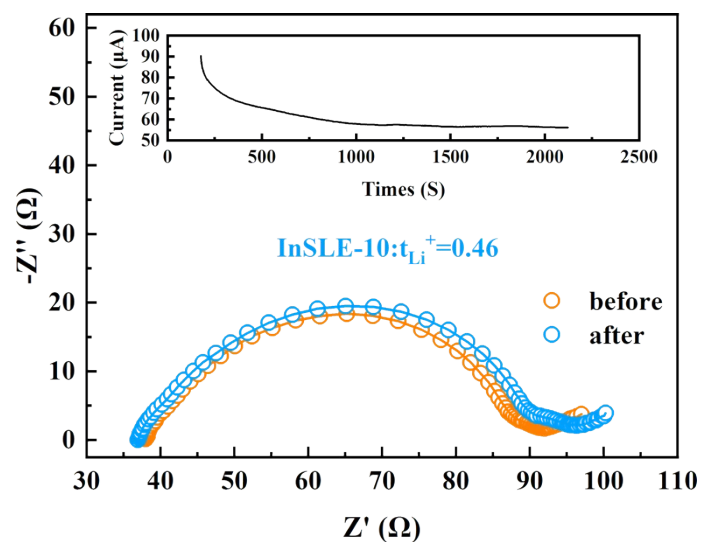

Fig. S10. The test for the  $t_{\text{Li}^+}$  of InSLE-10.

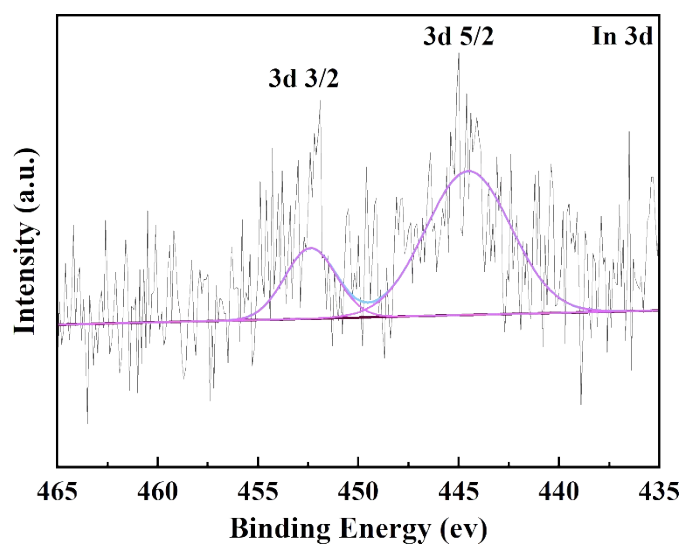

Fig. S11. The XPS In 3d spectra of the deposited Li with InSLE-10.

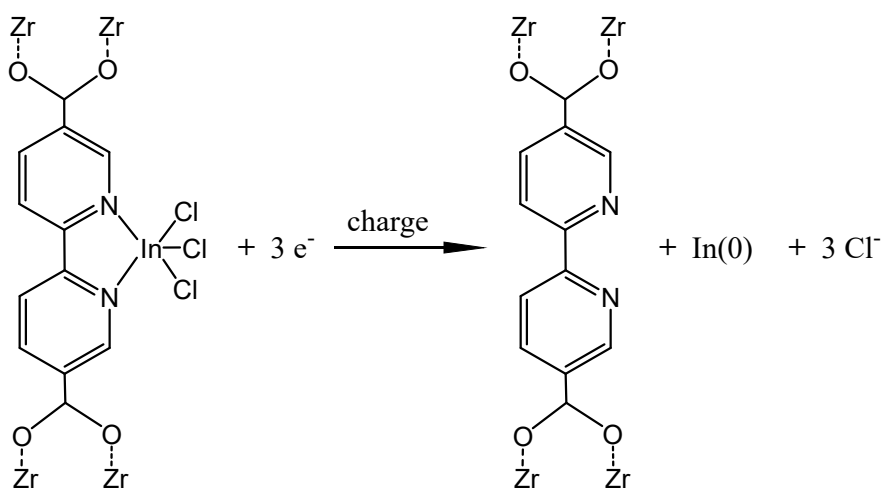

Fig. S12. The proposed mechanism for the formation of the In-rich SEI.

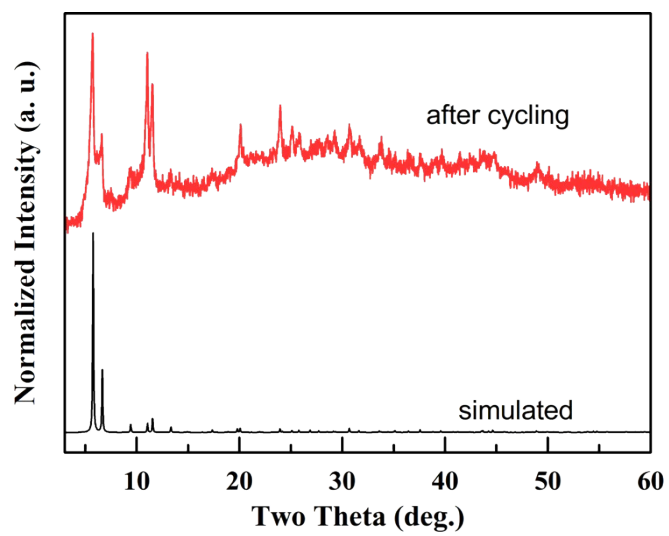

Fig. S13. XRD patterns of the SLE after plating/stripping cycling.

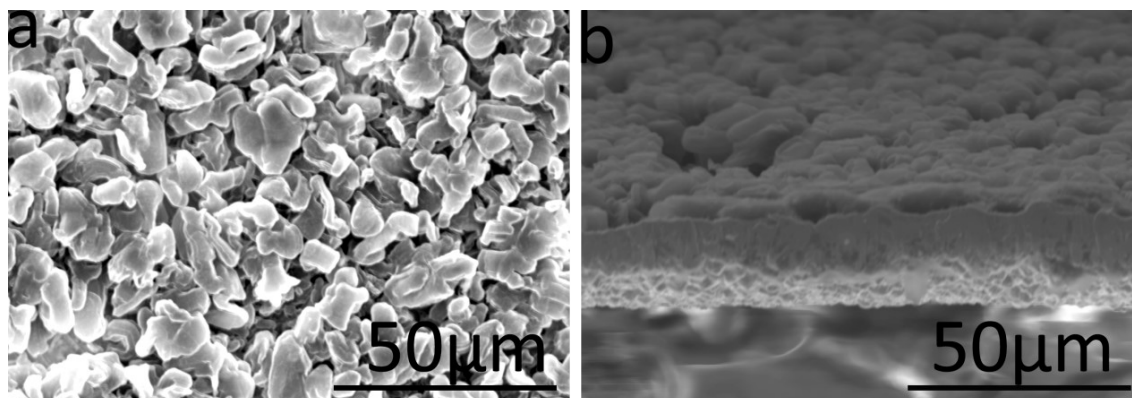

Fig. S14. SEM morphologies of the deposited Li ( $0.1 \text{ mA cm}^{-2}$ ,  $1.0 \text{ mAh cm}^{-2}$ ) with the InSLE. (a) Top view. (b) Cross-section view.

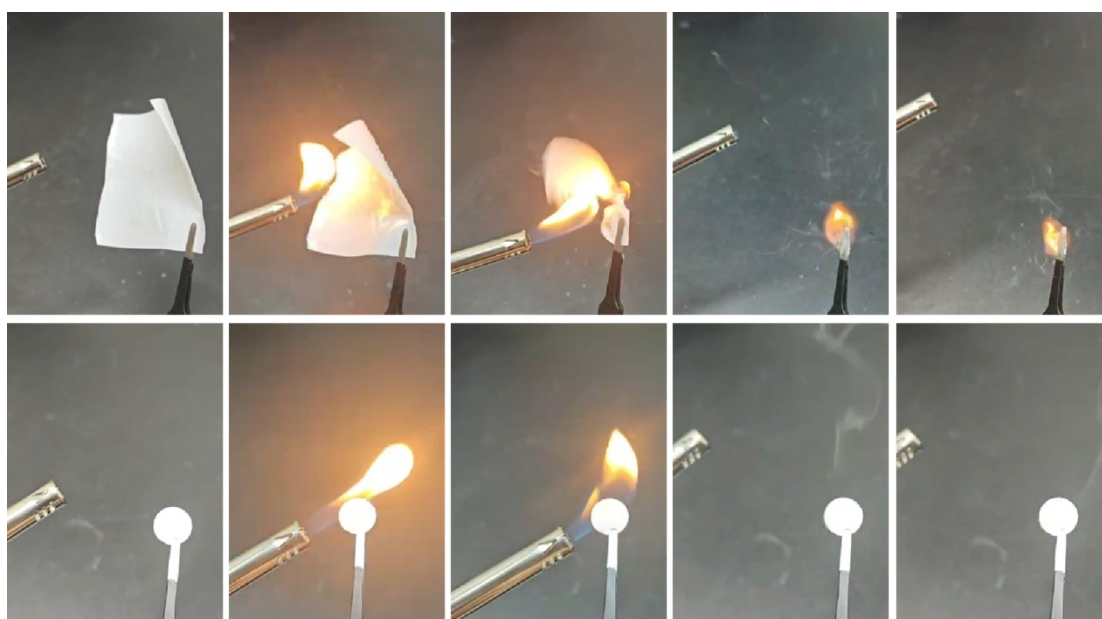

**Fig. S15.** Snapshots taken when the liquid PC electrolyte (on a Celgard separator, top) and the SLE (bottom) were exposed to the flame.

**Table S1.** Performance comparison of the reported LFP cells using MOF-based electrolytes.

| Materials                         | Cathodes | Specific Capacity (mAh g <sup>-1</sup> ) | Cycle number | Charge/discharge rate | Refs.     |
|-----------------------------------|----------|------------------------------------------|--------------|-----------------------|-----------|
| PEO/HKUST-1/LLZO/LiTFSI           | LFP      | 160                                      | 400          | 0.1 C@50°C            | 1         |
| HKUST/PIN                         | LFP      | 150                                      | 100          | 0.1 C@25°C            | 2         |
| NiCo-MOF/SN                       | LFP      | 159                                      | 200          | 0.2 C@25°C            | 3         |
| UiO-67/PVDF-HFP/ PVB              | LFP      | 156                                      | 200          | 0.1 C@60°C            | 4         |
| ZIF-8/PEO/LiTFSI                  | LFP      | 159                                      | 100          | 0.1 C@30°C            | 5         |
| Zn-MOF-74/LiTFSI                  | LFP      | 152                                      | 100          | 0.1 C@30°C            | 6         |
| UiO-66-NH <sub>2</sub> -LIM/Li-IL | LFP      | 160                                      | 200          | 0.1 C@25°C            | 7         |
| UiO-66-NH-M/AIBN                  | LFP      | 155                                      | 200          | 0.2 C@25°C            | 8         |
| UIO-66/SILs                       | LFP      | 160                                      | 100          | 0.1 C@25°C            | 9         |
| ZIF-8/PEO/LiClO <sub>4</sub>      | LFP      | 160                                      | 120          | 0.1 C@25°C            | 10        |
| InSLE-10                          | LFP      | 165                                      | 480          | 0.1 C@32°C            | This work |

#### References

- 1 M. Zhang, A. Yusuf and D.-Y. Wang, *J. Power Sources*, 2024, **591**, 233812.
- 2 X. Tian, Y. Yi, Z. Wu, G. Cheng, S. Zheng, B. Fang, T. Wang, D. G. Shchukin, F. Hai, J. Guo and M. Li, *Chem. Eng. Sci.*, 2023, **266**, 118271.
- 3 T. Zhao, W. Kou, Y. Zhang, W. Wu, W. Li and J. Wang, *J. Power Sources*, 2023, **554**, 232349.
- 4 Q. Zhang, T. Wei, J. Lu, C. Sun, Y. Zhou, M. Wang, Y. Liu, B. Xiao, X. Qiu and S. Xu, *J.*

- Electroanal. Chem.*, 2022, **926**, 116935.
- 5 C. Li, S. Deng, W. Feng, Y. Cao, J. Bai, X. Tian, Y. Dong and F. Xia, *Small*, 2023, **19**, 2300066.
- 6 P. Dong, X. Zhang, W. Hiscox, J. Liu, J. Zamora, X. Li, M. Su, Q. Zhang, X. Guo, J. McCloy and M.-K. Song, *Adv. Mater.*, 2023, **35**, 2211841.
- 7 Z. Wu, Y. Yi, F. Hai, X. Tian, S. Zheng, J. Guo, W. Tang, W. Hua and M. Li, *ACS Appl. Mater. Interfaces*, 2023, **15**, 22065.
- 8 W. Shang, Y. Chen, J. Han, P. Ouyang, C. Fang and J. Du, *ACS Appl. Energ. Mater.*, 2020, **3**, 12351.
- 9 Z. Liu, Z. Hu, X. Jiang, X. Wang, Z. Li, Z. Chen, Y. Zhang and S. Zhang, *Small*, 2022, **18**, 2203011.
- 10 Y. Xia, N. Xu, L. Du, Y. Cheng, S. Lei, S. Li, X. Liao, W. Shi, L. Xu and L. Mai, *ACS Appl. Mater. Interfaces*, 2020, **12**, 22930.
